# Supplementary material for: Independent Recruitment of Duplicated β-Subunit-Coding NAD-ME Genes Aided the Evolution of C4 Photosynthesis in Cleomaceae
Source: PubMed Central journal article supplement (PMC7573226; doi:10.3389/fpls.2020.572080), 2020-10-06
Supplement: Image_3.pdf [file Image_3.pdf]

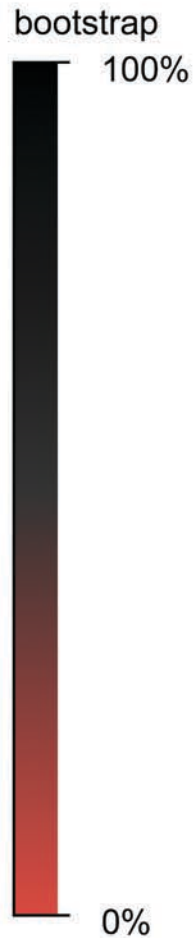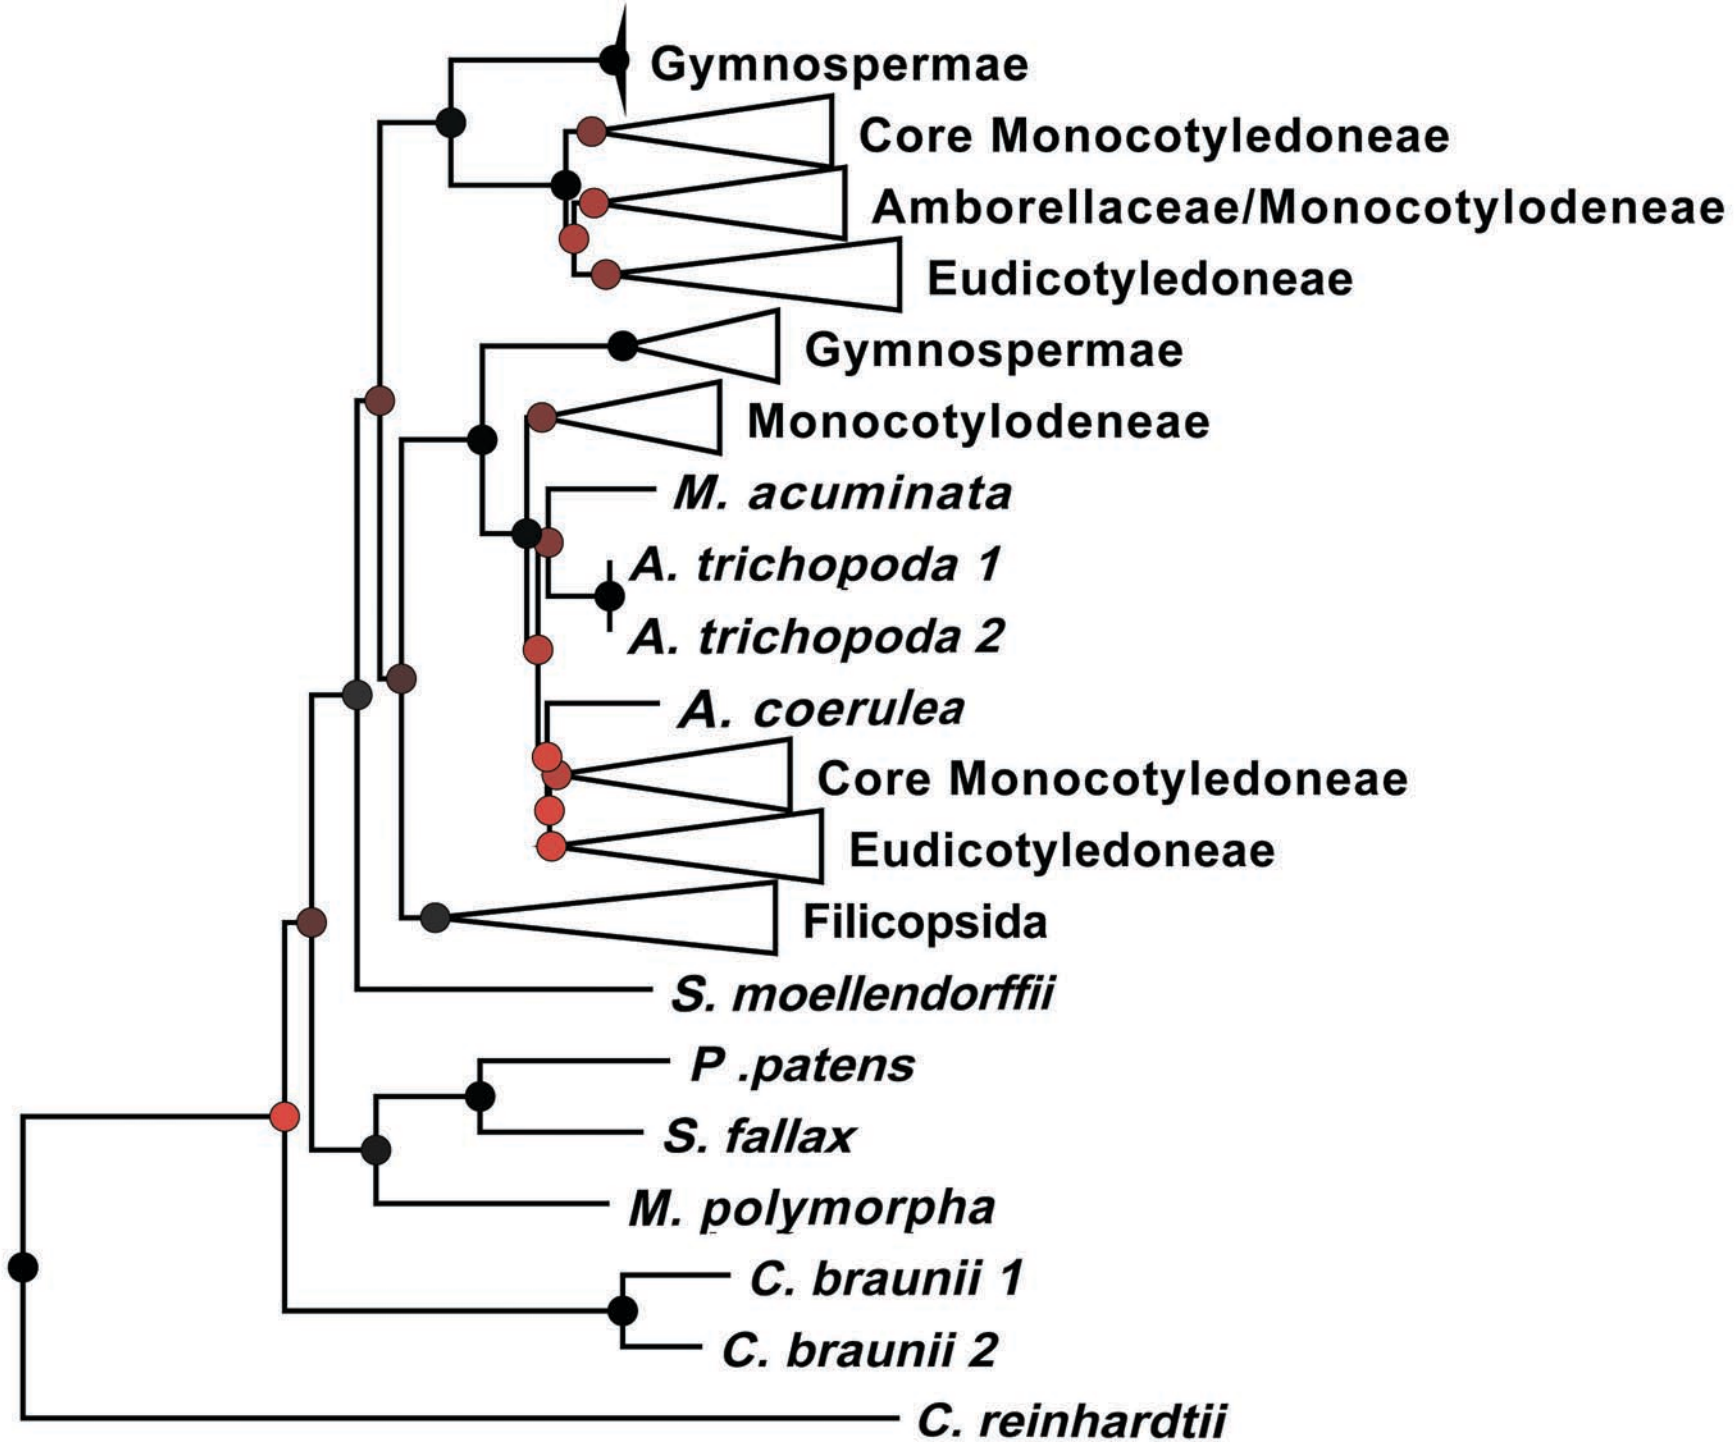

0.05
