# Supplementary material for: Independent Recruitment of Duplicated β-Subunit-Coding NAD-ME Genes Aided the Evolution of C4 Photosynthesis in Cleomaceae
Source: PubMed Central journal article supplement (PMC7573226; doi:10.3389/fpls.2020.572080), 2020-10-06
Supplement: Image_4.pdf [file Image_4.pdf]

0.0791

*C. clementina*

0.0015  
 0.0063 *A. lyrata*  
 0.0023  
 0.0071  
 0.0185 *A. halleri*  
 0.0101  
 0.0112  
 0.0022 *B. stricta*  
 0.0096  
 0.0069  
 0.0055  
 0.0206 *A. alpina*  
 0.0077  
 0.0382  
 0.0165  
 0.0063  
 0.0107 *E. salsugineum*  
 0.0018  
 0.0107 *B. oleracea*  
 0.0038  
 0.0203  
 0.0019  
 0.0024 *B. rapa*  
 0.0018  
 0.0018 *B. oleracea*

0.1482

0.0077  
 0.001  
 0.0242  
 0.001  
 0.0019  
 0.0004  
 0.01  
 0.0004  
 0.01  
 0.0161  
 0.0016  
 0.0023  
 0.0289  
 0.0391  
 0.0035  
 0.003  
 0.0111  
 0.0179  
 0.0116  
 0.0142  
 0.013  
 0.0185  
 0.013  
 0.0066  
 0.0066  
 0.0341  
 0.1047

*C. violaceae*  
*C. africana*  
*C. amblyocarpa*  
*C. arabica*  
*C. viscosa*  
*C. lutea*  
*P. graveolins*  
*P. graveolins*  
*P. trachysperma*  
*C. monophylla*  
*T. hassleriana B2*  
*T. hassleriana B1*  
*C. viridiflora*  
*C. paradoxa*  
*C. angustifolia B1*  
*G. gynandra B2*  
*C. angustifolia B2*  
*G. gynandra B1*

0.0246

*G. gynandra B1*

0.0361  
 0.0344  
 0.0109  
 0.0003  
 0.0157  
 0.004  
 0.0119  
 0.0051  
 0.0006  
 0.0073  
 0.0041  
 0.0153  
 0.0021  
 0.013  
 0.0067  
 0.0071  
 0.008  
 0.0117  
 0.0014  
 0.0163  
 0.0023  
 0.0076  
 0.0121  
 0.002  
 0.0125  
 0.0061  
 0.0119  
 0.0134  
 0.0336  
 0.0132  
 0.0026  
 0.0147  
 0.0038  
 0.0053  
 0.0025  
 0.0041

0.1725

0.0349

0.019

0.024

0.0688

*C. clementina*
